# Supplementary material
Source: PubMed Central journal article supplement (PMC3651873)

# Supplemental Figure 1

## moesin siRNA

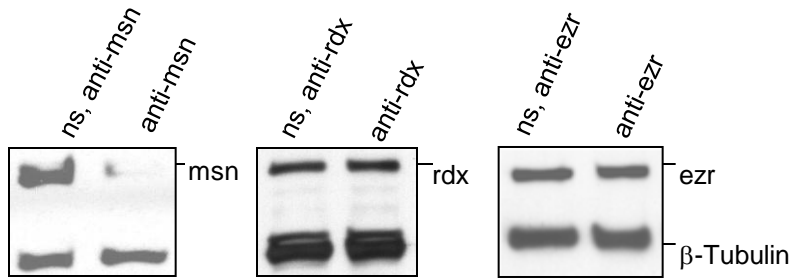

## ezrin siRNA

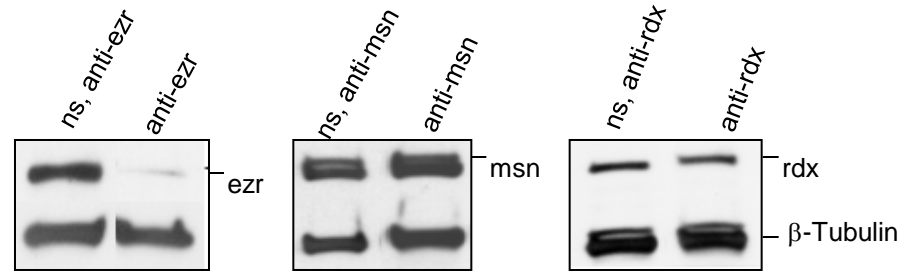

## radixin siRNA

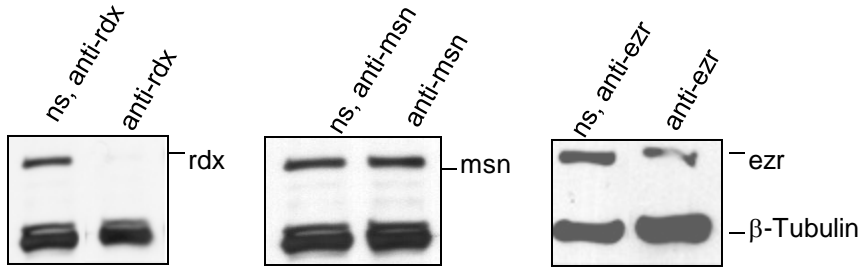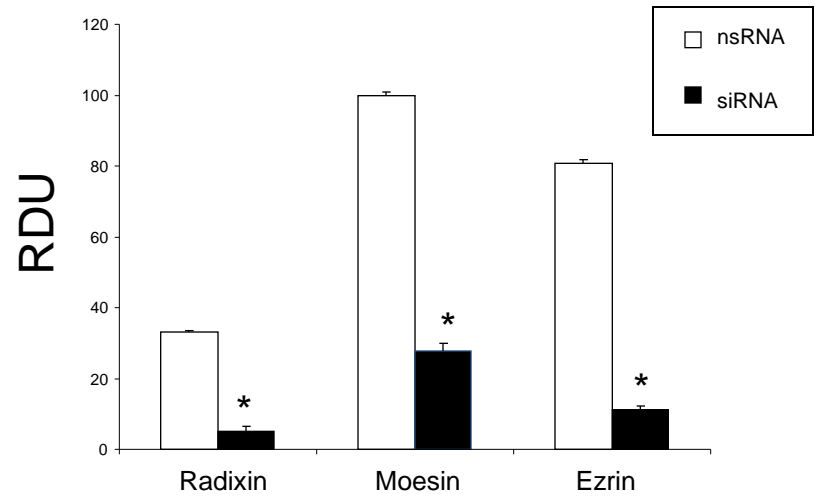

Supplement: NIHMS323461-supplement-01.pdf [file NIHMS323461-supplement-01.pdf]

# Supplemental Figure 2

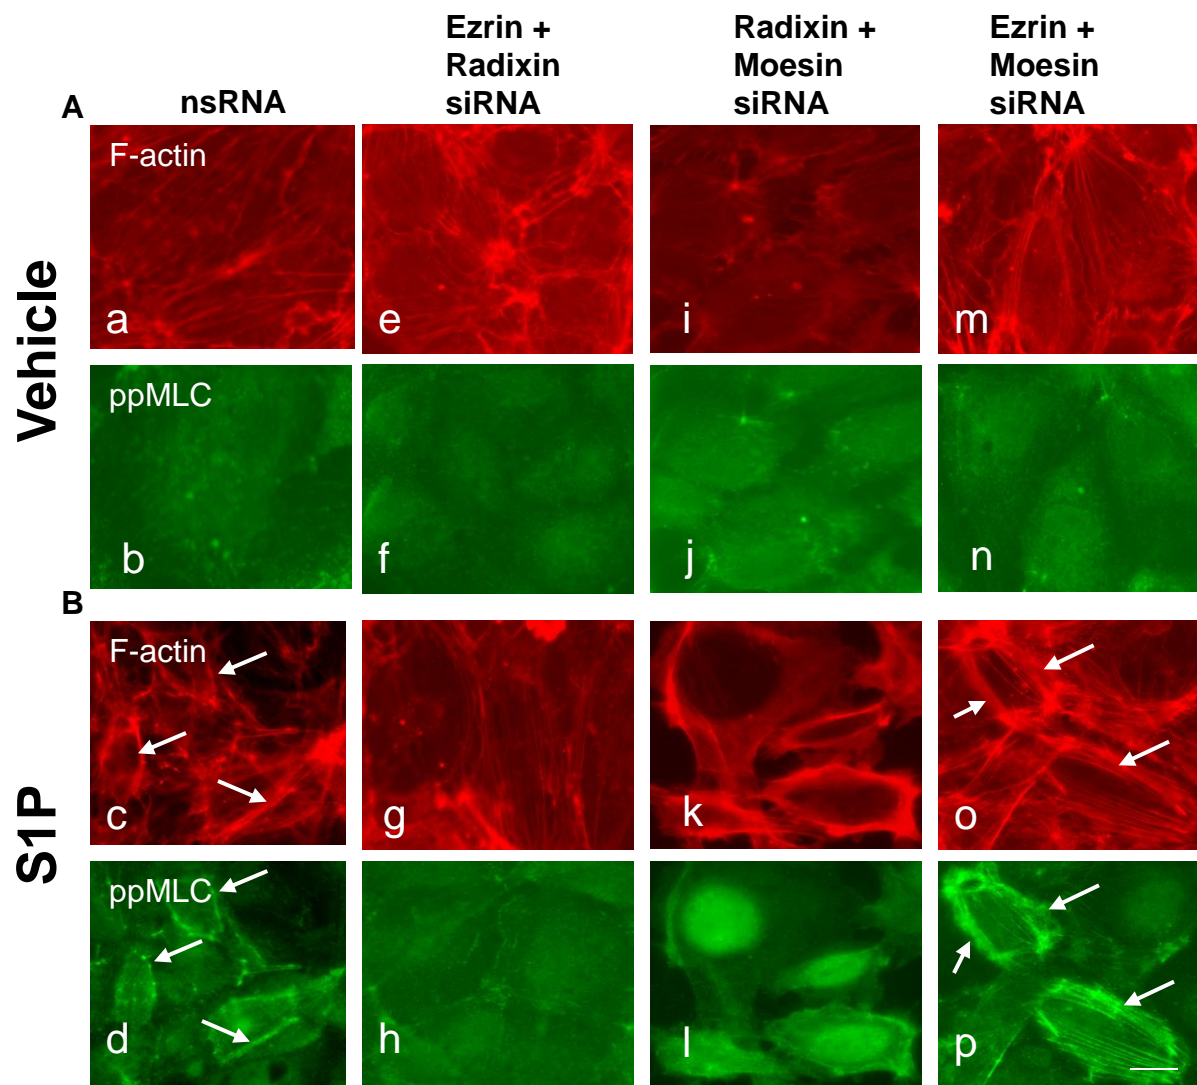

Supplement: NIHMS323461-supplement-02.pdf [file NIHMS323461-supplement-02.pdf]

# Supplemental Figure 3

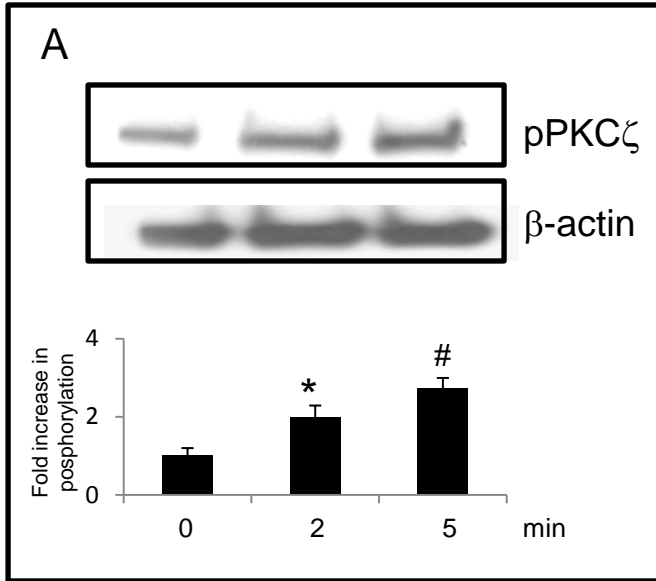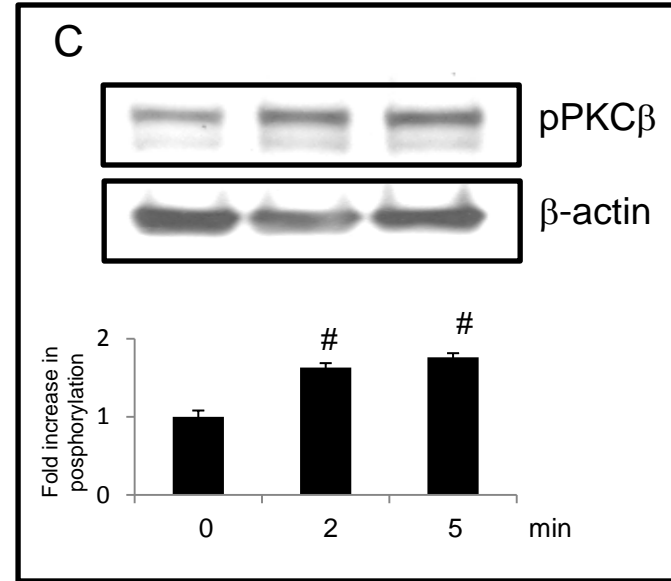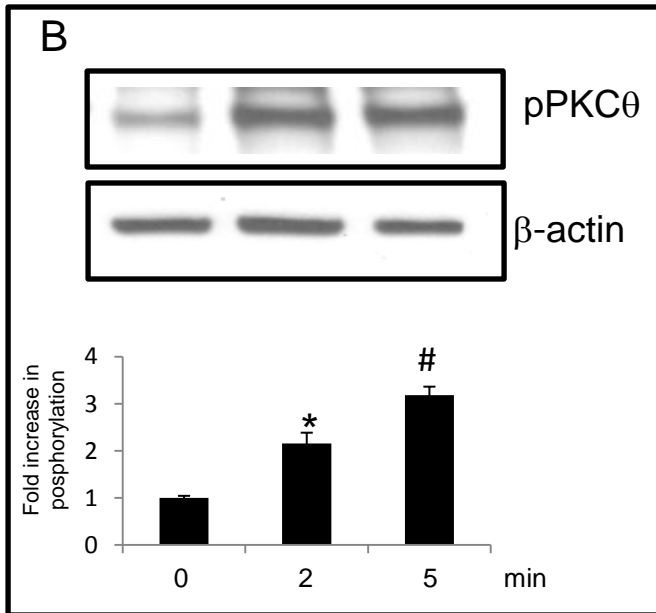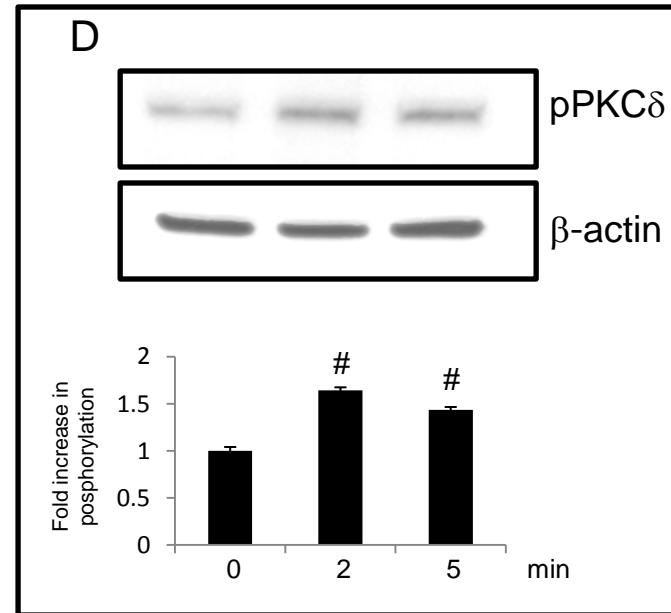

Supplement: NIHMS323461-supplement-03.pdf [file NIHMS323461-supplement-03.pdf]

# Supplemental Figure 4

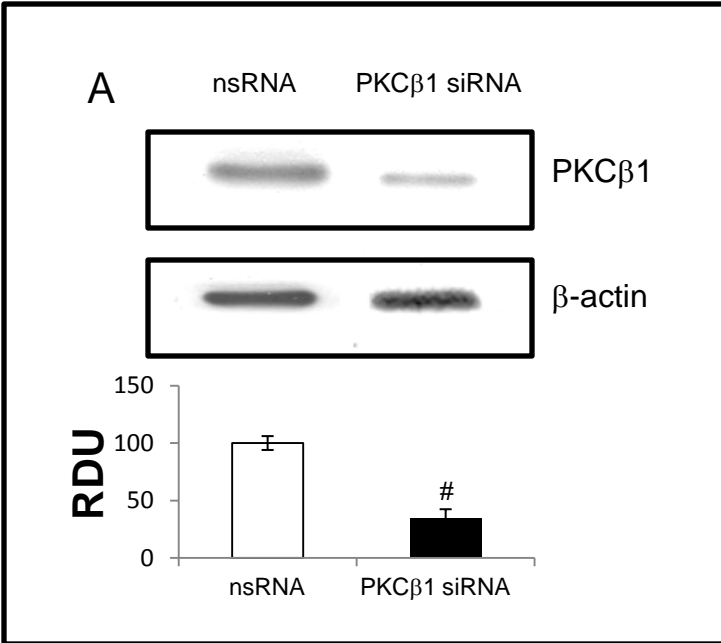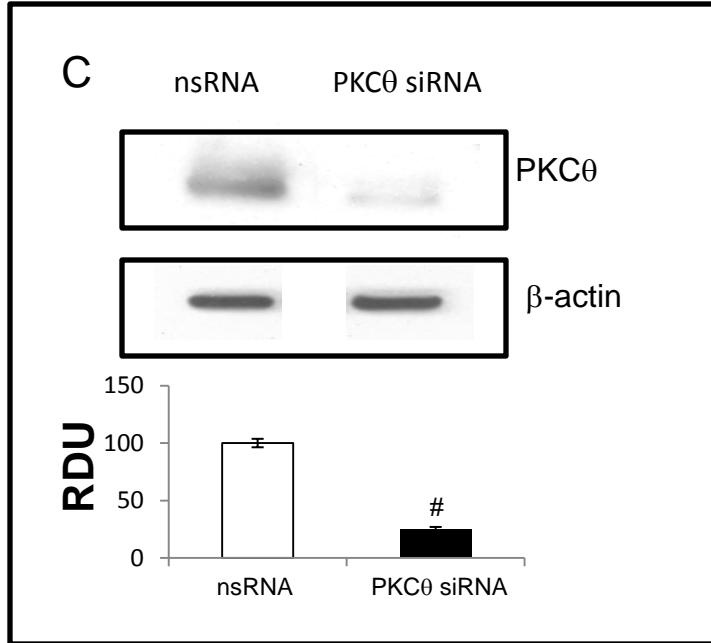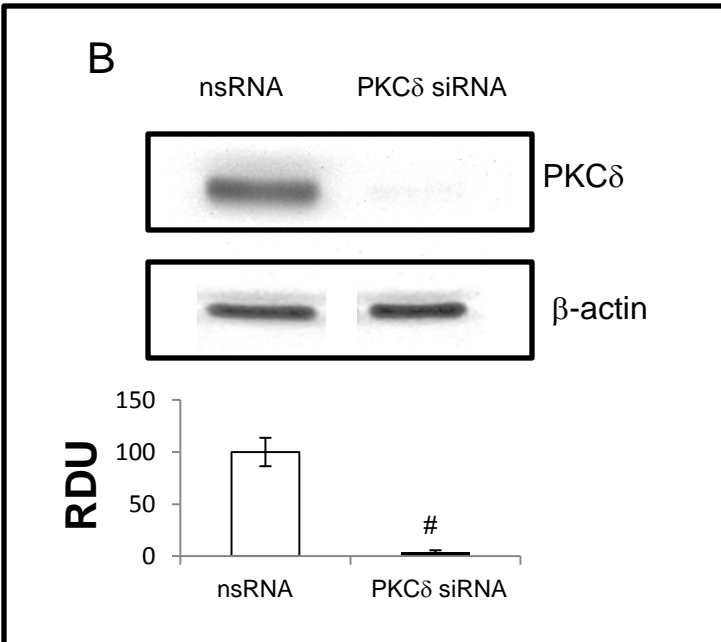

# Supplemental Figure 4

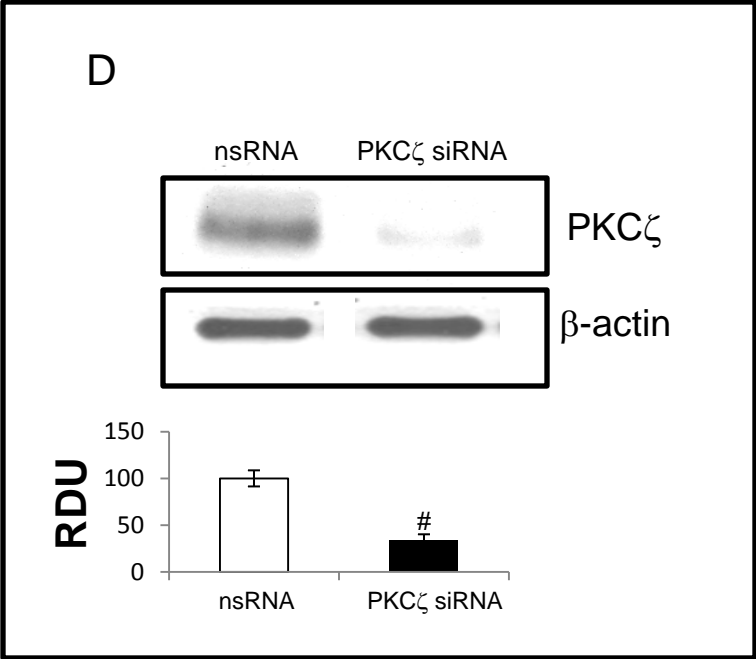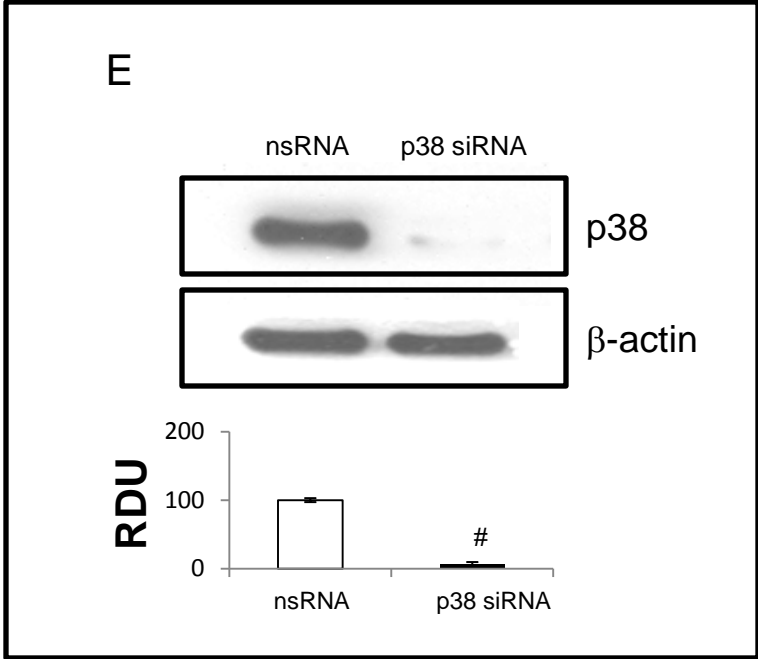

Supplement: NIHMS323461-supplement-04.pdf [file NIHMS323461-supplement-04.pdf]
